# Supplementary material for: Characterization of Macular Structural and Microvascular Changes in Thalamic Infarction Patients: A Swept-Source Optical Coherence Tomography–Angiography Study
Source: MDPI journal article supplement (doi:10.3390/brainsci12050518), 2022-04-20
Supplement: s1 [file s1]

Table S1. SS-OCT/SS-OCTA results stratified by duration of thalamic infarction.

|                      | Group1(n=20)   | Group 2(n=6)   | Group 3(n=9)    | $p^*$ | $p\ 1$       | $p\ 2$       | $p\ 3$       |
|----------------------|----------------|----------------|-----------------|-------|--------------|--------------|--------------|
| SVP, mm <sup>2</sup> | 0.198 ± 0.022  | 0.203 ± 0.022  | 0.198 ± 0.035   | 0.502 | <b>0.013</b> | <b>0.042</b> | 0.576        |
| ICP, mm <sup>2</sup> | 0.163 ± 0.026  | 0.167 ± 0.016  | 0.175 ± 0.016   | 0.455 | <b>0.004</b> | 0.200        | <b>0.023</b> |
| DCP, mm <sup>2</sup> | 0.112 ± 0.023  | 0.118 ± 0.011  | 0.121 ± 0.024   | 0.498 | 0.128        | 0.980        | 0.153        |
| RNFL, μm             | 16.94 ± 1.463  | 17.704 ± 1.165 | 17.173 ± 2.315  | 0.212 | 0.286        | 0.138        | 0.688        |
| GCIPL, μm            | 61.667 ± 8.131 | 62.740 ± 5.620 | 62.161 ± 10.691 | 0.595 | 0.211        | 0.223        | 0.692        |

Group 1: < 1 month; Group 2: 1-6 months; Group 3: >6 months.

$p^*$ value among the three groups;

$p1$ : Group1 vs Group 2;

$p2$ : Group1 vs Group 3;

$p3$ : Group2 vs Group 3.

Values in bold indicate  $p < 0.05$ .
